# Supplementary material
Source: PubMed Central journal article supplement (PMC2587606)
Supplement: 0806078105_0806078105SI.pdf [file 0806078105_0806078105SI.pdf]

# Supporting Information

Meyer et al. 10.1073/pnas.0806078105

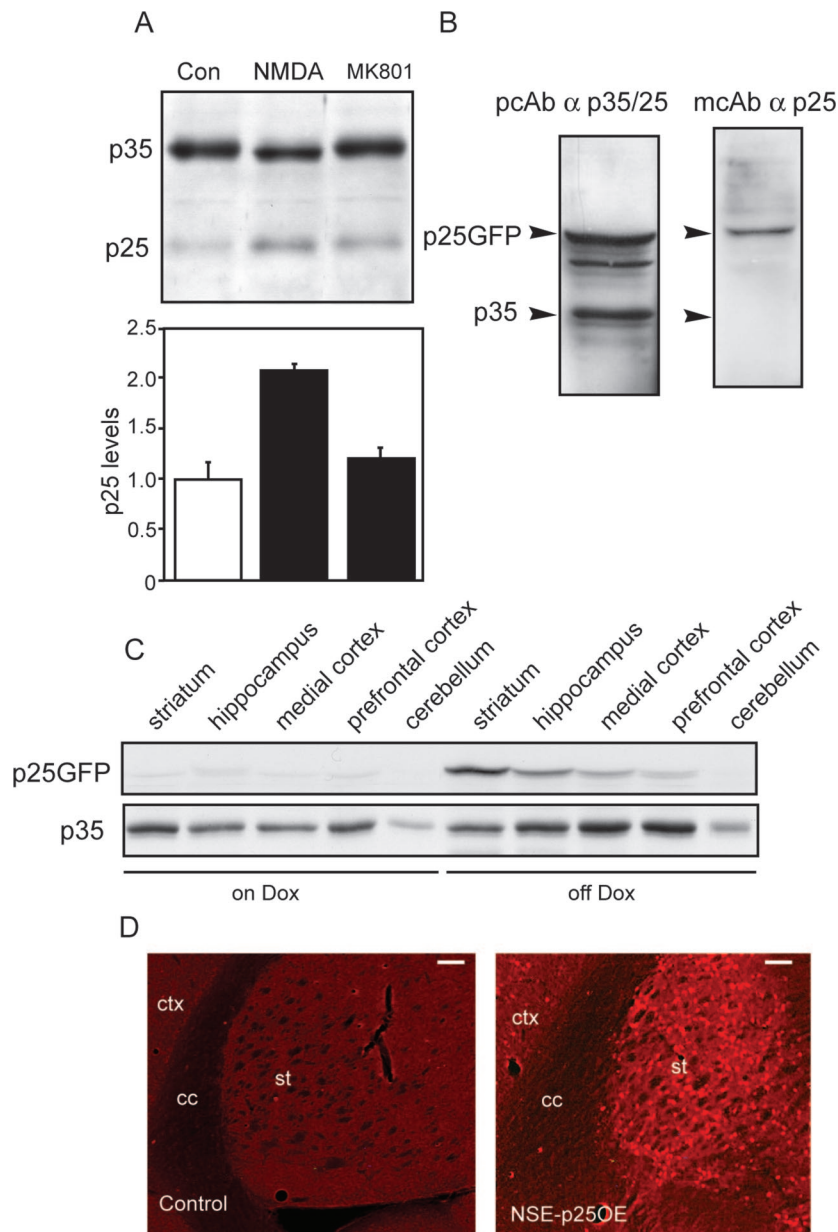

**Fig. S1.** NMDA and anti-p25 antibody specificity and tissue distribution of p25GFP overexpression. (A) Effect of NMDA on p25 generation is specific for NMDA receptors. Immunoblot analysis for p25 shows accumulation of p25 in WT mouse striatal slices in response to 100  $\mu$ M NMDA (30 min) is attenuated by co-treatment with the NMDA receptor antagonist MK801 (100  $\mu$ M). Quantitation is also shown (Lower;  $n = 2$ ). (B) P25 monoclonal Ab detects p25 but not p35. Immunoblot analysis of striatal lysates from NSE-p25OE mouse striatum with commercial monoclonal antibody to p35 detects p25GFP, p35, and some cross-reactive protein bands (Left). Immunoblots of the same sample with the p25 Ab detects only p25GFP. (C) Tissue distribution of p25GFP overexpression. Immunoblots of tissue lysates from indicated brain regions in animals on or off doxycycline (5 weeks) is shown. (D) Immunostain of p25GFP in litter-mate control and NSE-p25OE mice shows low-resolution coronal section of dorsal striatum (st), corpus callosum (cc), and adjacent cortex (ctx). (Scale bars, 100  $\mu$ m.)
